# Supplementary material for: Prenatal and Infancy Nurse Home Visiting and 18-Year Outcomes of a Randomized Trial
Source: Oxford University Press journal article supplement (doi:10.1542/peds.2018-3876), 2019-11-20
Supplement: peds_20183876supplementarydata.pdf [file peds_20183876supplementarydata.pdf]

## Supplemental Information

**SUPPLEMENTAL TABLE 6** No Covariate Model Estimates of Youth Cognitive, Language, Academic, and Executive Functioning Outcomes and SSI Benefit Received Among 18-Year-Old Youth in Intervention and Control Conditions

| Variable                          | Group            | Age at Assessment, <sup>a</sup> y | Control, T2 |                                | NV, T4 |                                | T4–T2                           |         |
|-----------------------------------|------------------|-----------------------------------|-------------|--------------------------------|--------|--------------------------------|---------------------------------|---------|
|                                   |                  |                                   | N           | LS Mean <sup>b</sup> or % (SE) | N      | LS Mean <sup>b</sup> or % (SE) | ES <sup>c</sup> or aOR (95% CI) | P       |
| Primary outcome                   |                  |                                   |             |                                |        |                                |                                 |         |
| Nonverbal intelligence            | Whole            | 18                                | 431         | LS mean 88.47 (0.62)           | 192    | LS mean 88.22 (0.93)           | ES −0.02 (−0.21 to 0.17)        | .83     |
|                                   | LPR <sup>d</sup> | 18                                | 227         | LS mean 85.80 (0.86)           | 106    | LS mean 86.35 (1.25)           | ES 0.05 (−0.21 to 0.30)         | .72     |
|                                   | Whole            | All <sup>e</sup>                  | 454         | LS mean 88.85 (0.48)           | 204    | LS mean 89.33 (0.72)           | ES 0.04 (−0.10 to 0.18)         | .58     |
|                                   | LPR <sup>d</sup> | All <sup>e</sup>                  | 237         | LS mean 86.58 (0.66)           | 111    | LS mean 87.61 (0.97)           | ES 0.09 (−0.11 to 0.28)         | .38     |
| Receptive language                | Whole            | 18                                | 427         | LS mean 81.95 (0.70)           | 194    | LS mean 81.94 (1.04)           | ES −0.00 (−0.18 to 0.17)        | .99     |
|                                   | LPR <sup>d</sup> | 18                                | 223         | LS mean 78.03 (0.97)           | 108    | LS mean 80.57 (1.39)           | ES 0.18 (−0.06 to 0.42)         | .14     |
|                                   | Whole            | All <sup>e</sup>                  | 454         | LS mean 82.41 (0.58)           | 204    | LS mean 82.92 (0.86)           | ES 0.04 (−0.11 to 0.18)         | .62     |
| Math achievement score            | LPR <sup>d</sup> | All <sup>e</sup>                  | 237         | LS mean 78.93 (0.79)           | 111    | LS mean 81.00 (1.16)           | ES 0.15 (−0.05 to 0.34)         | .14     |
|                                   | Whole            | 18                                | 428         | LS mean 80.57 (0.59)           | 193    | LS mean 82.03 (0.88)           | ES 0.12 (−0.05 to 0.29)         | .17     |
|                                   | LPR <sup>d</sup> | 18                                | 225         | LS mean 77.73 (0.81)           | 108    | LS mean 81.85 (1.17)           | ES 0.34 (0.11 to 0.57)          | .004*** |
|                                   | Whole            | All <sup>f</sup>                  | 454         | LS mean 85.40 (0.48)           | 205    | LS mean 86.34 (0.71)           | ES 0.08 (−0.06 to 0.22)         | .27     |
|                                   | LPR <sup>d</sup> | All <sup>f</sup>                  | 237         | LS mean 82.44 (0.66)           | 111    | LS mean 85.82 (0.97)           | ES 0.28 (0.09 to 0.47)          | .004*** |
| Secondary outcome                 |                  |                                   |             |                                |        |                                |                                 |         |
| Sustained attention               | Whole            | 18                                | 432         | LS mean 8.71 (0.13)            | 194    | LS mean 8.74 (0.19)            | ES 0.01 (−0.15 to 0.17)         | .91     |
|                                   | LPR <sup>d</sup> | 18                                | 227         | LS mean 8.20 (0.18)            | 108    | LS mean 8.47 (0.26)            | ES 0.09 (−0.13 to 0.31)         | .41     |
|                                   | Whole            | All <sup>g</sup>                  | 443         | LS mean 8.71 (0.12)            | 199    | LS mean 8.63 (0.18)            | ES −0.03 (−0.18 to 0.12)        | .70     |
|                                   | LPR <sup>d</sup> | All <sup>g</sup>                  | 232         | LS mean 8.43 (0.17)            | 110    | LS mean 8.43 (0.24)            | ES 0.00 (−0.20 to 0.20)         | .99     |
| Working memory index              | Whole            | 18                                | 432         | LS mean 8.37 (0.13)            | 194    | LS mean 8.62 (0.19)            | ES 0.09 (−0.07 to 0.26)         | .27     |
|                                   | LPR <sup>d</sup> | 18                                | 227         | LS mean 7.82 (0.17)            | 108    | LS mean 8.35 (0.25)            | ES 0.20 (−0.02 to 0.43)         | .08*    |
| Emotion recognition, No. correct  | Whole            | 18                                | 427         | LS mean 52.65 (0.40)           | 190    | LS mean 53.68 (0.61)           | ES 0.12 (−0.05 to 0.29)         | .16     |
|                                   | LPR <sup>d</sup> | 18                                | 225         | LS mean 51.69 (0.55)           | 104    | LS mean 53.47 (0.82)           | ES 0.21 (−0.02 to 0.45)         | .07*    |
| Risky decision-making             | Whole            | 18                                | 430         | LS mean 5.19 (0.19)            | 193    | LS mean 4.97 (0.29)            | ES −0.06 (−0.23 to 0.11)        | .52     |
|                                   | LPR <sup>d</sup> | 18                                | 227         | LS mean 5.09 (0.26)            | 107    | LS mean 5.10 (0.39)            | ES 0.00 (−0.23 to 0.23)         | .98     |
| High school graduation            | Whole            | 18                                | 431         | 71.4% (2.19)                   | 188    | 74.4% (3.27)                   | aOR 1.17 (0.79 to 1.74)         | .44     |
|                                   | LPR              | 18                                | 227         | 69.6% (3.05)                   | 106    | 68.9% (4.50)                   | aOR 0.97 (0.59 to 1.59)         | .89     |
| Graduate with honors <sup>h</sup> | Whole            | 18                                | 431         | 5.4% (1.16)                    | 188    | 10.2% (2.22)                   | aOR 1.99 (1.04 to 3.81)         | .04**   |
|                                   | LPR              | 18                                | 227         | 3.1% (1.15)                    | 106    | 8.5% (2.71)                    | aOR 2.92 (1.06 to 8.06)         | .04**   |
| SSI: disability <sup>h</sup>      | Whole            | 18                                | 429         | 6.9% (1.38)                    | 190    | 4.5% (1.55)                    | aOR 0.64 (0.28 to 1.45)         | .27     |
|                                   | LPR <sup>d</sup> | 18                                | 226         | 13.3% (2.26)                   | 104    | 5.8% (2.29)                    | aOR 0.40 (0.16 to 0.99)         | .03**   |

The estimates of intervention-control differences averaged over all other fixed classification variables, including those within subjects, and the same treatment effect are restricted to the group defined by LPR. This table shows the least-squares means at 18 y and repeated measures over time (labeled “all” under “age at assessment”), which also are averaged over other fixed classification effects. For estimates of treatment effects based on repeated measures, we assumed an error structure with different variances at each time for a given child and different covariance between pairs of times within each child. These were assumed to be the same for all children, and covariance between children was assumed to be negligible. Contrasts at specific, earlier time points are presented in earlier publications.<sup>10–15</sup> LS, least squares; T2, prenatal transportation plus developmental screening and referral; T4, prenatal transportation plus developmental screening and referral and prenatal and infant and/or toddler nurse home visits.

<sup>a</sup> Age 18 assessment denoted by 18 y; repeated-measures assessment is denoted by “all.” The exact ages aggregated for repeated-measures estimates are given in footnotes.

<sup>b</sup> Adjusted.

<sup>c</sup> Expressed in SD units.

<sup>d</sup> Subgroup defined by youth mothers falling into the lower half of the distribution for PR (LPR).

<sup>e</sup> Ages 6 and 18.

<sup>f</sup> Ages 6, 12, and 18.

<sup>g</sup> Ages 12 and 18.

<sup>h</sup> Exploratory outcome.

\*  $P < .10$ ; \*\*  $P < .05$ ; \*\*\*  $P < .01$ .

**SUPPLEMENTAL TABLE 7** No Covariate Model Estimates of Youth Substance-Use Disorders, Drug or Alcohol Use, STIs, Pregnancies, Births, Behavioral Problems, Arrests, Convictions, and Gang Activity

| Variable                                                                       | Group   | Age at Assessment, y | Control, T2 |                                | NV, T4 |                                | T4–T2<br>ES, <sup>b</sup> aOR, IR, or HR (95% CI) | P   |
|--------------------------------------------------------------------------------|---------|----------------------|-------------|--------------------------------|--------|--------------------------------|---------------------------------------------------|-----|
|                                                                                |         |                      | N           | LS Mean <sup>a</sup> or % (SE) | N      | LS Mean <sup>a</sup> or % (SE) |                                                   |     |
| Primary outcome                                                                |         |                      |             |                                |        |                                |                                                   |     |
| Time to substance-use disorder <sup>c,d</sup>                                  | Whole   | 18                   | 435         | 11.3% (1.44)                   | 194    | 13.7% (2.25)                   | HR 1.23 (0.82 to 1.85)                            | .32 |
| Current drug use SR past month or positive laboratory test result <sup>e</sup> | Whole   | 18                   | 423         | 48.2% (2.43)                   | 190    | 51.6% (3.63)                   | aOR 1.14 (0.81 to 1.61)                           | .44 |
| Time to first pregnancy <sup>c,d</sup>                                         | Males   | 18                   | 210         | 18.2% (2.58)                   | 95     | 15.6% (3.36)                   | HR 0.84 (0.50 to 1.42)                            | .52 |
|                                                                                | Females | 18                   | 225         | 26.6% (2.88)                   | 99     | 24.3% (4.06)                   | HR 0.90 (0.58 to 1.40)                            | .65 |
| Time to first live birth <sup>c,d</sup>                                        | Males   | 18                   | 210         | 6.9% (1.65)                    | 95     | 8.0% (2.45)                    | HR 1.17 (0.57 to 2.40)                            | .67 |
|                                                                                | Females | 18                   | 225         | 16.8% (2.42)                   | 99     | 14.3% (3.28)                   | HR 0.84 (0.49 to 1.46)                            | .54 |
| Any positive STI laboratory test result                                        | Males   | 18                   | 198         | 15.7% (2.58)                   | 88     | 14.8% (3.78)                   | aOR 0.93 (0.46 to 1.89)                           | .85 |
|                                                                                | Females | 18                   | 220         | 23.2% (2.85)                   | 99     | 26.3% (4.42)                   | aOR 1.18 (0.68 to 2.04)                           | .55 |
| HIV risk (log transformed)                                                     | Whole   | 18                   | 417         | LS mean −13.51 (0.17)          | 187    | LS mean −13.68 (0.26)          | ES −0.05 (−0.22 to 0.12)                          | .58 |
| Internalizing behavior problems <sup>f,g</sup>                                 | Whole   | 18                   | 431         | 18.0% (1.95)                   | 194    | 17.1% (2.83)                   | aOR 0.94 (0.59 to 1.50)                           | .78 |
|                                                                                | Whole   | All <sup>g</sup>     | 459         | 20.8% (1.35)                   | 207    | 17.9% (1.86)                   | aOR 0.83 (0.62 to 1.12)                           | .23 |
| No. arrests <sup>c</sup>                                                       | Whole   | 18                   | 435         | LS mean 0.36 (0.05)            | 194    | LS mean 0.39 (0.08)            | IR 1.09 (0.65 to 1.80)                            | .75 |
|                                                                                | Females | 18                   | 225         | LS mean 0.24 (0.05)            | 99     | LS mean 0.22 (0.07)            | IR 0.94 (0.44 to 2.02)                            | .88 |
| No. convictions <sup>c</sup>                                                   | Whole   | 18                   | 435         | LS mean 0.28 (0.04)            | 194    | LS mean 0.27 (0.06)            | IR 0.97 (0.57 to 1.64)                            | .90 |
|                                                                                | Females | 18                   | 225         | LS mean 0.21 (0.04)            | 99     | LS mean 0.12 (0.04)            | IR 0.58 (0.25 to 1.34)                            | .20 |
| No. interpersonal violence arrests <sup>c</sup>                                | Whole   | 18                   | 435         | LS mean 0.14 (0.03)            | 194    | LS mean 0.20 (0.05)            | IR 1.44 (0.76 to 2.72)                            | .26 |
|                                                                                | Females | 18                   | 225         | LS mean 0.10 (0.03)            | 99     | LS mean 0.15 (0.06)            | IR 1.55 (0.60 to 4.00)                            | .36 |
| No. interpersonal violence convictions <sup>c</sup>                            | Whole   | 18                   | 435         | LS mean 0.10 (0.02)            | 194    | LS mean 0.15 (0.04)            | IR 1.42 (0.71 to 2.81)                            | .32 |
|                                                                                | Females | 18                   | 225         | LS mean 0.09 (0.03)            | 99     | LS mean 0.08 (0.04)            | IR 0.91 (0.32 to 2.61)                            | .86 |
| Ever in a gang <sup>c</sup>                                                    | Whole   | 18                   | 432         | 10.9% (1.50)                   | 193    | 14.5% (2.54)                   | aOR 1.39 (0.84 to 2.30)                           | .20 |
| Secondary outcome                                                              |         |                      |             |                                |        |                                |                                                   |     |
| Externalizing behavior problems <sup>h</sup>                                   | Whole   | 18                   | 424         | 7.6% (1.33)                    | 187    | 8.6% (2.14)                    | aOR 1.15 (0.60 to 2.20)                           | .67 |
|                                                                                | Whole   | All <sup>g</sup>     | 459         | 14.4% (1.21)                   | 206    | 14.9% (1.82)                   | aOR 1.04 (0.74 to 1.46)                           | .83 |
| Total behavior problems <sup>g,h</sup>                                         | Whole   | 18                   | 424         | 4.5% (1.04)                    | 187    | 7.2% (1.97)                    | aOR 1.64 (0.77 to 3.45)                           | .20 |
|                                                                                | Whole   | All <sup>g</sup>     | 459         | 8.4% (0.96)                    | 206    | 8.1% (1.53)                    | aOR 0.96 (0.60 to 1.53)                           | .86 |

The estimates of intervention-control differences averaged over all other fixed classification variables, including those within subjects, and the same treatment effect are restricted to the group defined by females for arrest and conviction outcomes. This table shows the least-squares means at 18 y and repeated measures over time, which also are averaged over other fixed classification effects. For estimates of treatment effects based on repeated measures (labeled “all” under “age at assessment”), we assumed an error structure with different variances at each time for a given child and different covariance between pairs of times within each child. These were assumed to be the same for all children, and covariance between children was assumed to be negligible. Contrasts at specific, earlier time points are presented in earlier publications.<sup>10–15</sup> HR, hazards ratio; LS, least squares; SR, self-report; T2, prenatal transportation plus developmental screening and referral; T4, prenatal transportation plus developmental screening and referral and prenatal and infant and/or toddler nurse home visits.

<sup>a</sup> Adjusted.

<sup>b</sup> Expressed in SD units.

<sup>c</sup> Arrest-related outcomes were based on self-report combined with maternal and other-caregiver report (when available).

<sup>d</sup> Survival rate at age 18 from Cox proportional hazard model.

<sup>e</sup> Based on both self-report for all substances and urine assays for specific substances: phencyclidine, benzodiazepines, cocaine, amphetamines, tetrahydrocannabinol, opiates, and barbiturates.

<sup>f</sup> Internalizing problems were based on youth self-report at ages 12 and 18 and maternal and/or other-caregiver report at child age 6, indicated by values exceeding the borderline or clinical threshold.

<sup>g</sup> Ages 6, 12, and 18.

<sup>h</sup> Externalizing and total problems were based on reports in which mothers and/or other caregivers (age 6); mothers and/or other caregivers, teachers, and children (2 of 3 at age 12); and youth and mothers and/or other caregivers (age 18) reported scores that exceeded the borderline or clinical threshold.
